# Supplementary material
Source: Springer Nature journal article supplement (https://www.springermedizin.de/resource/supplementary/12950_2011_214_MOESM7_ESM.pdf/9558212)

# Control

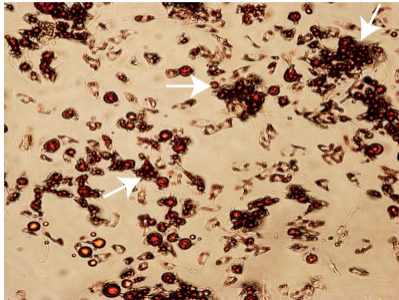

# SR1

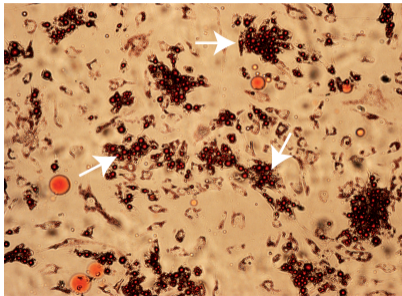

Supplement: MOESM7 [file 9558212]
